# Supplementary material for: Prediction Models for Intrauterine Growth Restriction Using Artificial Intelligence and Machine Learning: A Systematic Review and Meta-Analysis
Source: MDPI journal article supplement (doi:10.3390/healthcare11111617), 2023-06-01
Supplement: s1 [file s1]

Table S2. Summary of quality assessments using CASP appraisal checklist.

| Author             | Study type   | Items on CASP checklist |    |    |    |    |    |    |    |    |     |     | Raw score and % | Risk     |
|--------------------|--------------|-------------------------|----|----|----|----|----|----|----|----|-----|-----|-----------------|----------|
|                    |              | Q1                      | Q2 | Q3 | Q4 | Q5 | Q6 | Q7 | Q8 | Q9 | Q10 | Q11 |                 |          |
| Zhiwei Guo         | Case Control | 1                       | 1  | 1  | 0  | 1  | 1  | 1  | 1  | 1  | 1   | 1   | 10/11 = 91%     | Low      |
| Sonia Dahdoud      | Case Control | 1                       | 1  | 1  | 1  | 1  | 1  | 1  | 1  | 1  | 1   | 0   | 10/11 = 91%     | Low      |
| F Lunghi           | Case Control | 1                       | 1  | 1  | 0  | 0  | 1  | 1  | 1  | 1  | 1   | 0   | 8/11 = 73%      | Low      |
| G.Magenes          | Case Control | 1                       | 1  | 1  | 0  | 1  | 1  | 1  | 1  | 1  | 1   | 1   | 10/11 = 91%     | Low      |
| Maria G. Signorini | Case Control | 1                       | 1  | 1  | 0  | 1  | 1  | 1  | 1  | 1  | 1   | 1   | 10/11 = 91%     | Low      |
| I.C. Crockart      | Case Control | 1                       | 1  | 1  | 1  | 0  | 1  | 1  | 1  | 1  | 1   | 1   | 10/11 = 91%     | Low      |
| Ray Bahado-Singh   | Case Control | 1                       | 1  | 1  | 1  | 1  | 1  | 1  | 1  | 1  | 1   | 1   | 11/11 = 100%    | Low      |
| Nicolo Pini        | Case Control | 1                       | 1  | 1  | 1  | 0  | 1  | 1  | 1  | 1  | 1   | 1   | 10/11 = 91%     | Low      |
| G. Magenes         | Case Control | 1                       | 1  | 1  | 0  | 1  | 1  | 1  | 1  | 1  | 1   | 1   | 10/11 = 91%     | Low      |
| C Xu               | Case Control | 1                       | 1  | 1  | 0  | 1  | 1  | 1  | 1  | 1  | 1   | 1   | 10/11 = 91%     | Low      |
| Massimo Buscema    | Case Control | 1                       | 1  | 1  | 0  | 1  | 1  | 1  | 1  | 1  | 1   | 1   | 10/11 = 91%     | Low      |
| F. Foltran         | Case Control | 1                       | 1  | 1  | 0  | 0  | 1  | 1  | 0  | 1  | 1   | 0   | 7/11 = 64%      | Moderate |
| Maria E Street     | Case Control | 1                       | 1  | 1  | 0  | 0  | 1  | 1  | 1  | 1  | 1   | 1   | 9/11 = 82%      | Low      |
| M. Ferrario        | Case Control | 1                       | 1  | 1  | 0  | 0  | 1  | 1  | 1  | 1  | 1   | 1   | 9/11 = 82%      | Low      |
| R Deval            | Case-Control | 1                       | 1  | 0  | 0  | 1  | 0  | 1  | 0  | 1  | U   | 1   | 6/11 = 54%      | Moderate |
| L Gómez-Jemes      | Case-Control | 1                       | 1  | 1  | 0  | 1  | 1  | 1  | 1  | 1  | 1   | 1   | 10/11 = 91%     | Low      |
| H Sufriyana        | Case-Control | 1                       | 1  | 1  | 0  | 1  | 1  | 1  | 1  | 1  | 1   | 1   | 10/11 = 91%     | Low      |
| N Aslam            | Case-Control | 1                       | 1  | 1  | 0  | 1  | 1  | 1  | 1  | 1  | 1   | 1   | 10/11 = 91%     | Low      |
| F Gürgen           | Case-Control | 1                       | 1  | 1  | 0  | 1  | 1  | 1  | 1  | 1  | 1   | 1   | 10/11 = 91%     | Low      |
| SN Van             | Case-Control | 1                       | 1  | 1  | 0  | 1  | 1  | 1  | 1  | 1  | 1   | 1   | 10/11 = 91%     | Low      |

**CASP** Criteria to be scored: **Q1**. Is the CPR clearly defined? **Q2**. Did the population from which the rule was derived include an appropriate spectrum of patients? **Q3**. Was the rule validated in a different group of patients? **Q4**. Were the predictor variables and the outcome evaluated in a blinded fashion? **Q5**. Were the predictor variables and the outcome evaluated in the whole sample selected initially? **Q6**. Are the statistical methods used to construct and validate the rule clearly described? **Q7**. Can the performance of the rule be calculated? **Q8**. How precise was the estimate of the treatment effect? **Q9**. Would the prediction rule be reliable and the results interpretable if used for your patient? **Q10**. Is the rule acceptable in your case? **Q11**. Would the results of the rule modify your decision about the management of the patient, or the information you can give to him/her?

1 = Yes, 0 = No, and U = Unclear.

**Abbreviations:** 1 = Yes; 0 = No; U = Unclear; NA = Not Applicable; CASP; Critical Appraisal Skills Programme.

**Criteria used to rank the risk of bias**

- i)  $\leq 49\%$  = High risk of Bias
- ii) 50% and 69% = Moderate risk of Bias (2 Studies)
- iii) Above 70% = Low risk of Bias (18 studies)
