# Supplementary material for: Prediction Models for Intrauterine Growth Restriction Using Artificial Intelligence and Machine Learning: A Systematic Review and Meta-Analysis
Source: MDPI journal article supplement (doi:10.3390/healthcare11111617), 2023-06-01
Supplement: s1 [file s1]

Table S1. Summary of quality assessments using JBI appraisal checklist.

| Author             | Study type   | Items on Joanna Briggs Institute |    |    |    |    |    |    |    |    |     | Raw score and % | Risk     |
|--------------------|--------------|----------------------------------|----|----|----|----|----|----|----|----|-----|-----------------|----------|
|                    |              | Q1                               | Q2 | Q3 | Q4 | Q5 | Q6 | Q7 | Q8 | Q9 | Q10 |                 |          |
| Zhiwei Guo         | Case Control | 1                                | 1  | 1  | 1  | 1  | 1  | 1  | 1  | 1  | 1   | 10/10 = 100%    | Low      |
| Sonia Dahdoud      | Case Control | 1                                | 1  | 1  | 1  | 1  | 1  | 1  | U  | 1  | 1   | 9/10 = 90%      | Low      |
| F Lunghi           | Case Control | 1                                | 1  | 1  | 1  | 1  | 0  | 0  | 1  | 1  | 1   | 8/10 = 80%      | Low      |
| G.Magenes          | Case Control | 1                                | 1  | 1  | 1  | 1  | 0  | 0  | 1  | 1  | 1   | 8/10 = 80%      | Low      |
| Maria G. Signorini | Case Control | 1                                | 1  | 1  | 1  | 1  | 1  | 1  | 1  | 1  | 1   | 10/10 = 100%    | Low      |
| I.C. Crockart      | Case Control | 1                                | 1  | 1  | 1  | 1  | 1  | 1  | U  | 1  | 1   | 9/10 = 90%      | Low      |
| Ray Bahado-Singh   | Case Control | 1                                | 1  | 1  | 1  | 1  | 1  | 1  | 1  | 1  | 1   | 10/10 = 100%    | Low      |
| Nicolo Pini        | Case Control | 1                                | 1  | 1  | 1  | 1  | 1  | 1  | 1  | 0  | 1   | 9/10 = 90%      | Low      |
| G. Magenes         | Case Control | 1                                | 1  | 1  | 1  | 1  | 1  | 1  | 1  | 1  | 1   | 10/10 = 100%    | Low      |
| C Xu               | Case Control | 1                                | 1  | U  | 1  | 1  | 1  | U  | 1  | 1  | 1   | 8/10 = 80%      | Low      |
| Massimo Buscema    | Case Control | 1                                | 1  | 1  | 1  | 1  | 1  | 0  | 1  | 1  | 1   | 9/10 = 90%      | Low      |
| F. Foltran         | Case Control | 0                                | 0  | 0  | 0  | 0  | 1  | 0  | 0  | U  | 0   | 1/10 = 10%      | High     |
| Maria E Street     | Case Control | 1                                | 1  | 1  | 1  | 1  | 0  | 0  | 1  | 0  | 1   | 7/10 = 70%      | Low      |
| M. Ferrario        | Case Control | 1                                | 1  | 1  | 1  | 1  | 0  | 0  | 1  | 1  | U   | 7/10 = 70%      | Low      |
| R Deval            | Case-Control | 0                                | 0  | 0  | U  | 1  | 0  | 0  | 0  | 0  | 0   | 1/10 = 10%      | High     |
| L Gomes-James      | Case-Control | 1                                | 0  | 1  | 1  | 1  | 0  | 0  | 1  | 1  | 1   | 7/10 = 70%      | Low      |
| N Aslam            | Case-Control | 1                                | 1  | 1  | 1  | 1  | 0  | 0  | 1  | 1  | 1   | 8/10 = 80%      | Low      |
| H Sufriyana        | Case-Control | 1                                | 1  | 1  | 1  | 1  | 0  | 0  | 1  | 1  | 1   | 8/10 = 80%      | Low      |
| F Gürgen           | Case-Control | 1                                | 1  | 1  | U  | U  | 0  | 0  | 1  | 1  | 0   | 5/10 = 50%      | Moderate |
| SN Van             | Case-Control | 1                                | 1  | 1  | 1  | 1  | 0  | 0  | 1  | 1  | 1   | 8/10 = 80%      | Low      |

JBI Criteria to be scored: Q1. Were the groups comparable other than presence of disease in cases or absence of disease in controls? Q2. Were cases and controls matched appropriately? Q3. Were the same criteria used for identification of cases and controls? Q4. Was exposure measured in a standard, valid and reliable way? Q5. Was exposure measured in the same way for cases and controls? Q6. Were confounding factors identified? Q7. Were strategies to deal with confounding factors stated? Q8. Were outcomes assessed in a standard, valid and reliable way for cases and controls? Q9. Was the exposure period of interest long enough to be meaningful? Q10. Was appropriate statistical analysis used?

1 = Yes, 0 = No, and U = Unclear.

**Abbreviations:** 1 = Yes; 0 = No; U = Unclear; JBI: Joanna Briggs Institute

**Criteria used to rank the risk of bias**

- i)  $\leq 49\%$  = high risk of Bias (2 Studies)
- ii) 50% and 69% = Moderate risk of Bias (1 study)
- iii) Above 70% = low risk of Bias (17 studies)
